# Supplementary figures and images for: A high-value-added application of the stems of Rheum palmatum L. as a healthy food: the nutritional value, chemical composition, and anti-inflammatory and antioxidant activities
Source: Royal Society of Chemistry journal article supplement (doi:10.1039/d1fo04214a), 2022-01-01

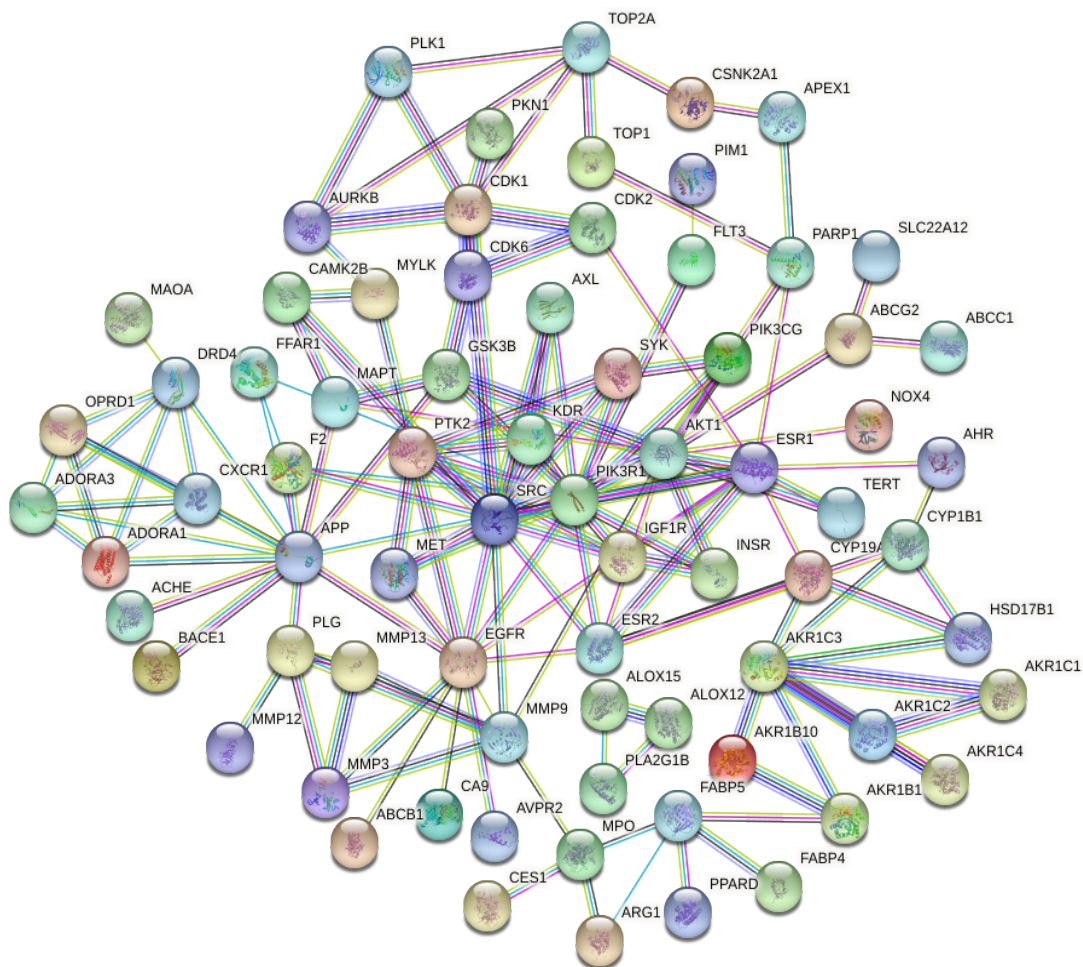

Figure S1: The core hub of PPI network

Supplement: d1fo04214a1.pdf [file d1fo04214a1.pdf]
